# Supplementary material for: CD163+ Tumor-Associated Macrophages Correlated with Poor Prognosis and Cancer Stem Cells in Oral Squamous Cell Carcinoma
Source: Hindawi journal article supplement (doi:10.1155/2014/838632), 2014-01-01

Supplementary Figure 1

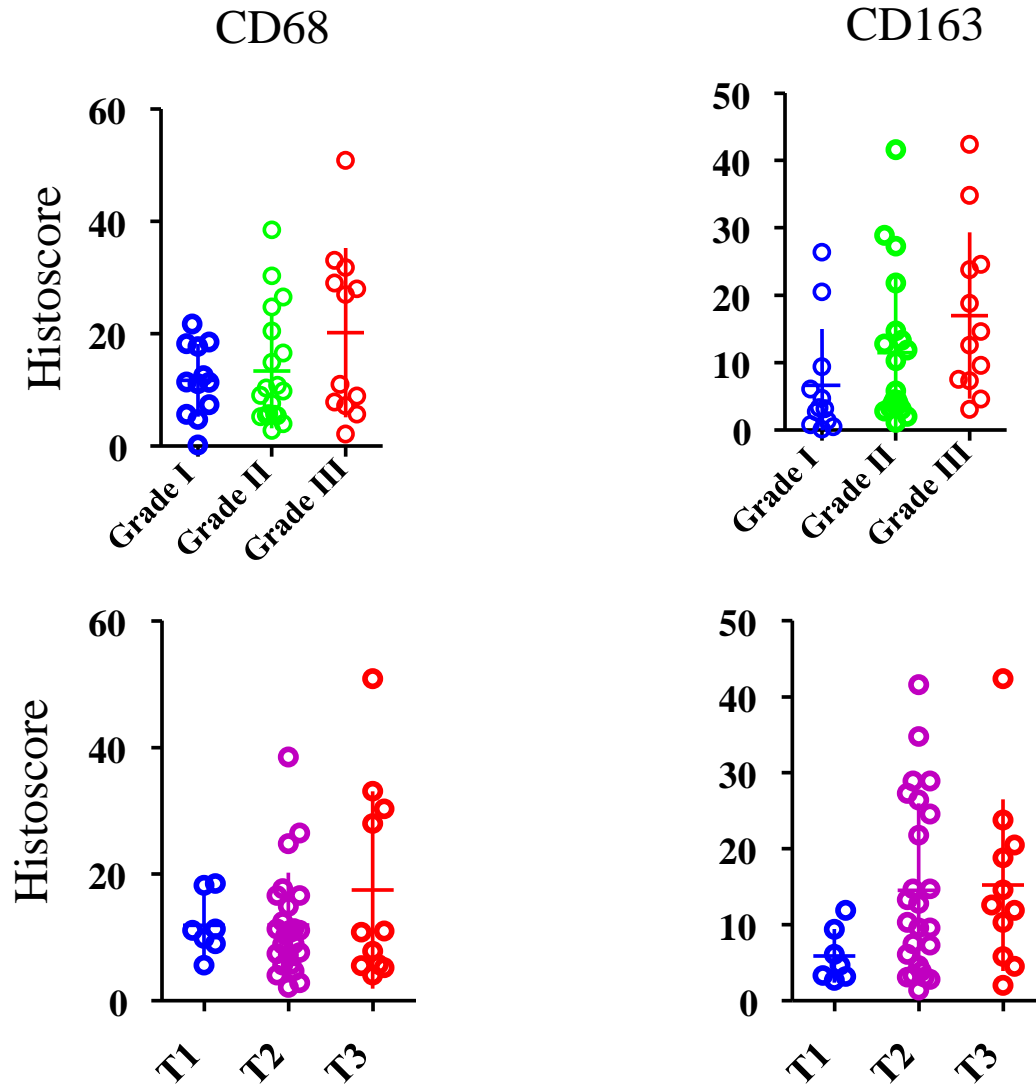

# Supplementary Figure 2

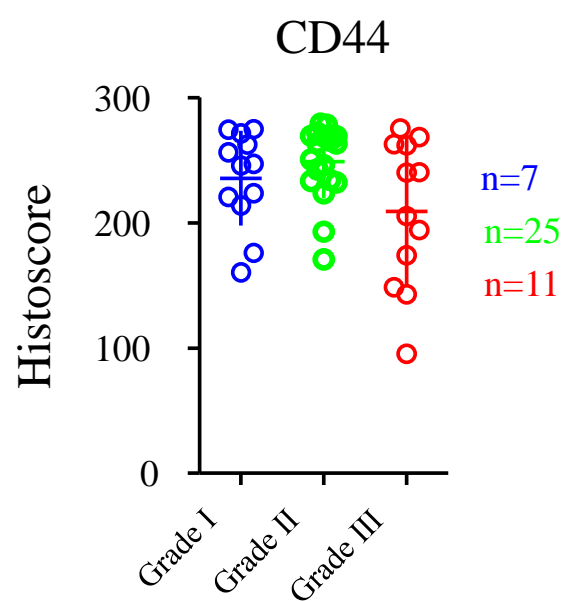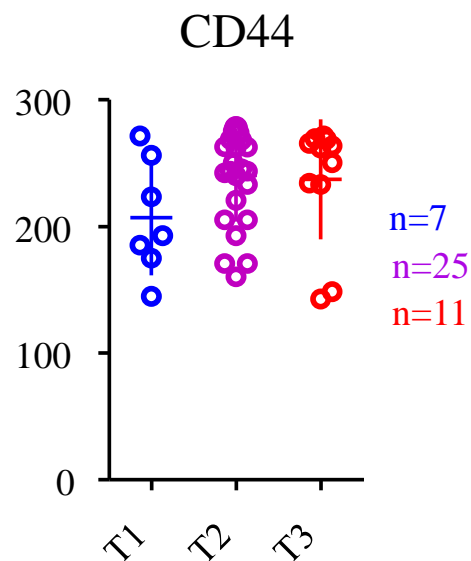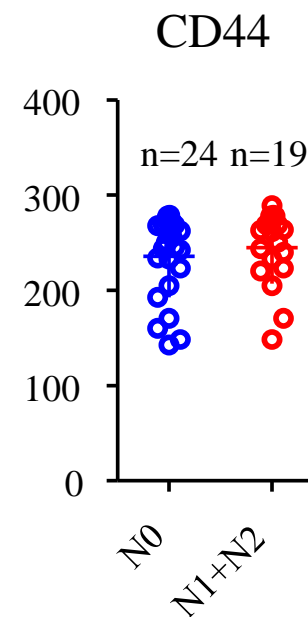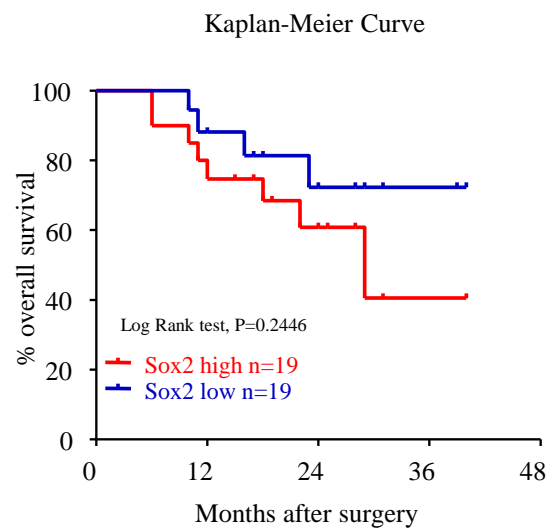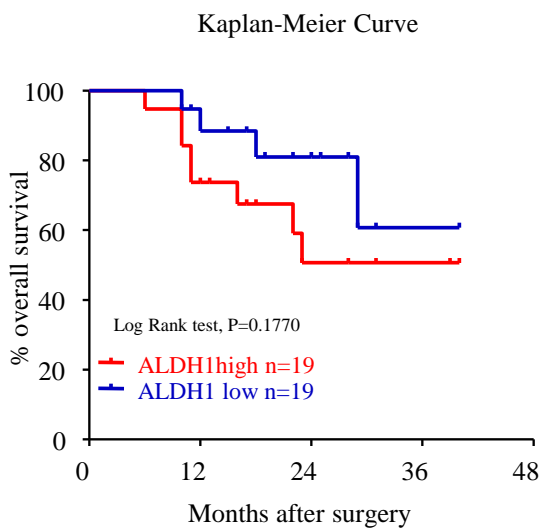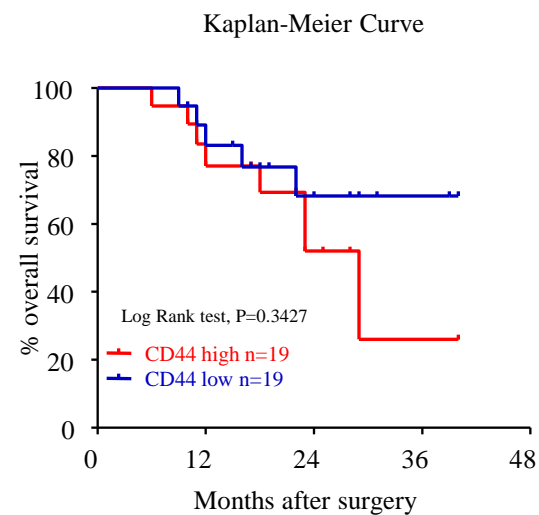

Supplement: f1 [file 838632.f1.pdf]
